# Supplementary material for: Chloroplastic SaNADP-ME4 of C3–C4 Woody Desert Species Salsola laricifolia Confers Drought and Salt Stress Resistance to Arabidopsis
Source: MDPI journal article supplement (doi:10.3390/plants10091827), 2021-09-03
Supplement: s1 [file s1]

Table S1 List of primers for RT-qPCR

| Gene name                          | GenBank<br>accession number | Primers (5' to 3')                                 |
|------------------------------------|-----------------------------|----------------------------------------------------|
| <i>P5CS1</i>                       | AT2G39800                   | F: ACCAGAAGCACGGTCATTC<br>R: CCATCTGAGAATCTTGTG    |
| <i>P5CS2</i>                       | AT3G55610                   | F: ATGATCTTATTTATGTTCTGC<br>R: CACTACTTCCGTCACTAT  |
| <i>SOD1</i>                        | AT1G08830                   | F: ATGTCTACTGGTCCACATTTTC<br>R: ATGGCCTCCCTTTCCGAG |
| <i>SOD2</i>                        | AT2G28190                   | F: ATGTATCTCAACAGGACCAC<br>R: AGTGGTCAGACTAAGCTC   |
| <i>SOD3</i>                        | AT3G10920                   | F: AGTGAAGGTGGTGGAGAGC<br>G: CATCTATACCCACCAGAG    |
| <i>POD1</i>                        | AT1G14550                   | F: CCATAGGACAATCTCAATGC<br>R: TGATCGGTTACTAATAG    |
| <i>POD2</i>                        | AT2G18140                   | F: TCCGGGAGCCACACCATTGG<br>R: TGGTCGGAATTCAACAG    |
| <i>POD3</i>                        | AT5G58400                   | F: GGCAAGCCAGGTGCGTCAC<br>R: CCGGCTGTAGGATACGAC    |
| <i><math>\alpha</math>-tubulin</i> | AT1G50010                   | F: GATGTACCGTGGTGATGTC<br>R: GAGCCTCTGAAAATTCTCC   |
